# Supplementary material for: Impacts of biomass burning and photochemical processing on the light absorption of brown carbon in the southeastern Tibetan Plateau
Source: Copernicus journal article supplement (doi:10.5194/acp-2022-618), 2022-10-04
Supplement: Supplementary file 1 [file acp-2022-618-supplement.pdf]

1 *Supplement of*

2 **Impacts of biomass burning and photochemical processing on the**  
3 **light absorption of brown carbon in the southeastern Tibetan Plateau**

4 Jie Tian<sup>1,2</sup>, Qiyuan Wang<sup>1,2</sup>, Yongyong Ma<sup>3</sup>, Jin Wang<sup>1</sup>, Yongming Han<sup>1,2</sup>, and Junji Cao<sup>1,4</sup>

5 <sup>1</sup>Key Laboratory of Aerosol Chemistry and Physics, State Key Laboratory of Loess and Quaternary Geology, Institute of Earth  
6 Environment, Chinese Academy of Sciences, Xi'an 710061, China

7 <sup>2</sup>CAS Center for Excellence in Quaternary Science and Global Change, Xi'an 710061, China

8 <sup>3</sup>Meteorological Institute of Shaanxi Province, Xi'an 710015, China

9 <sup>4</sup>Institute of Atmospheric Physics, Chinese Academy of Sciences, Beijing 100029, China

10

11 *Correspondence:* Qiyuan Wang (wangqy@ieecas.cn) and Junji Cao (jjcao@mail.iap.ac.cn)

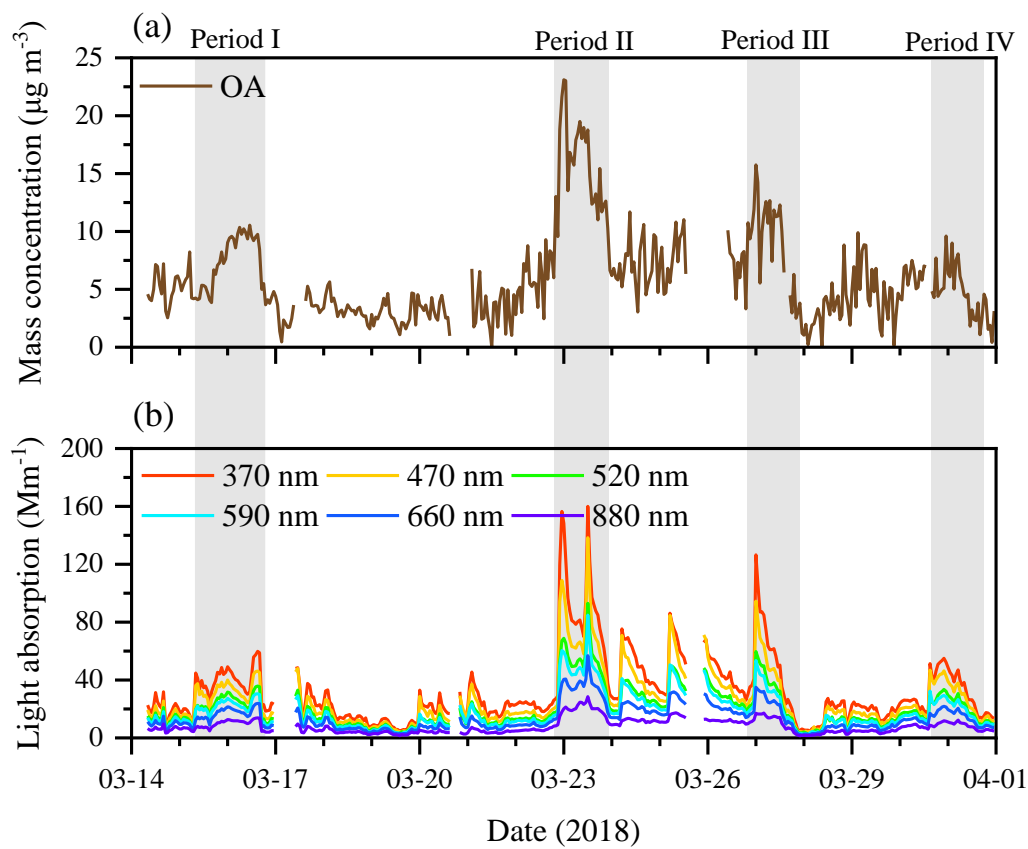

13

14 **Figure S1.** Hourly variations in (a) OA mass concentrations and (b) submicron aerosol light absorption coefficients ( $b_{\text{abs}}$ ) at  
 15 different wavelengths (370, 470, 520, 590, 660 and 880 nm) at Gaomeigu from 14 to 31 March, 2018.

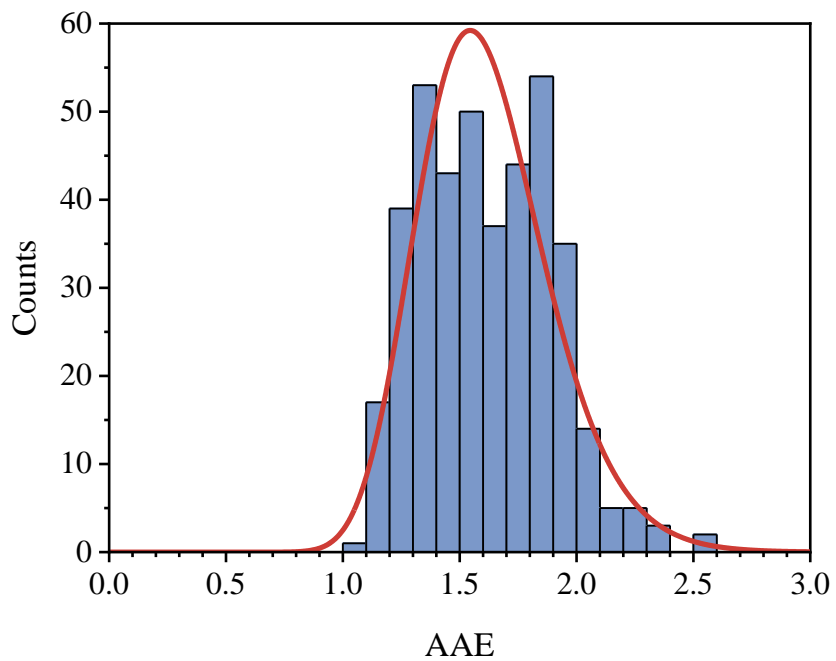

16

17 **Figure S2.** Frequency histograms of hourly absorption Ångström exponent (AAE) values during the entire campaign.

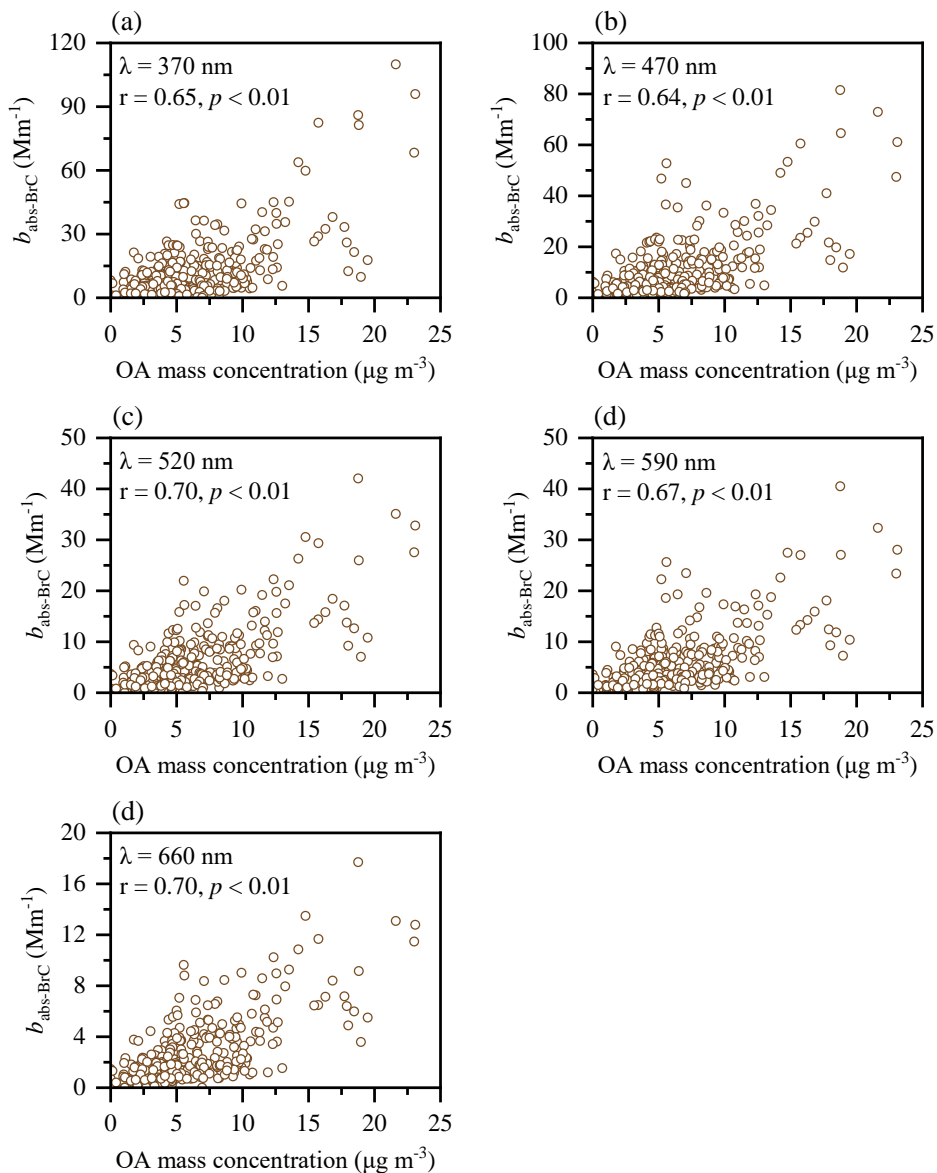

18

19 **Figure S3.** Pearson correlations between OA mass concentration and light absorption coefficient of BrC ( $b_{\text{abs-BrC}}$ ) at the  
 20 wavelength ( $\lambda$ ) of (a) 370 nm, (b) 470 nm, (c) 520 nm, (d) 590 nm, and (e) 660 nm.

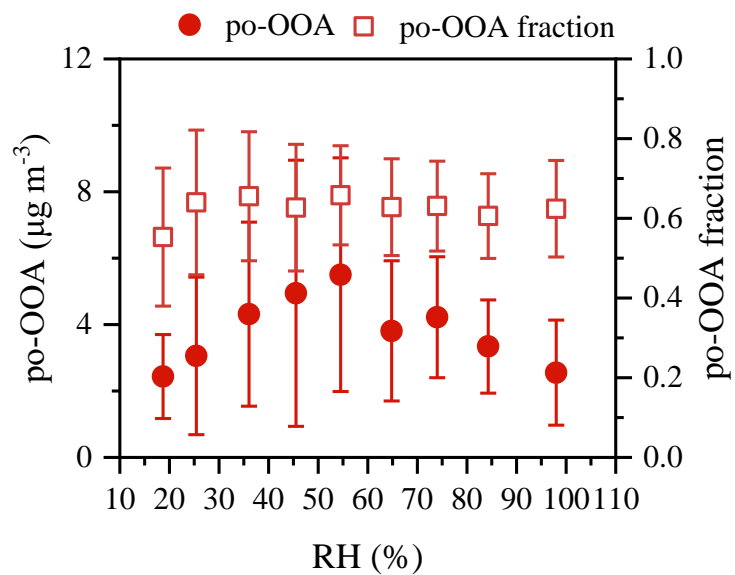

21

22 **Figure S4.** Variations of po-OOA mass concentration and its fraction in OA as a function of RH. The data are grouped in RH

23 bins (10 % increment).

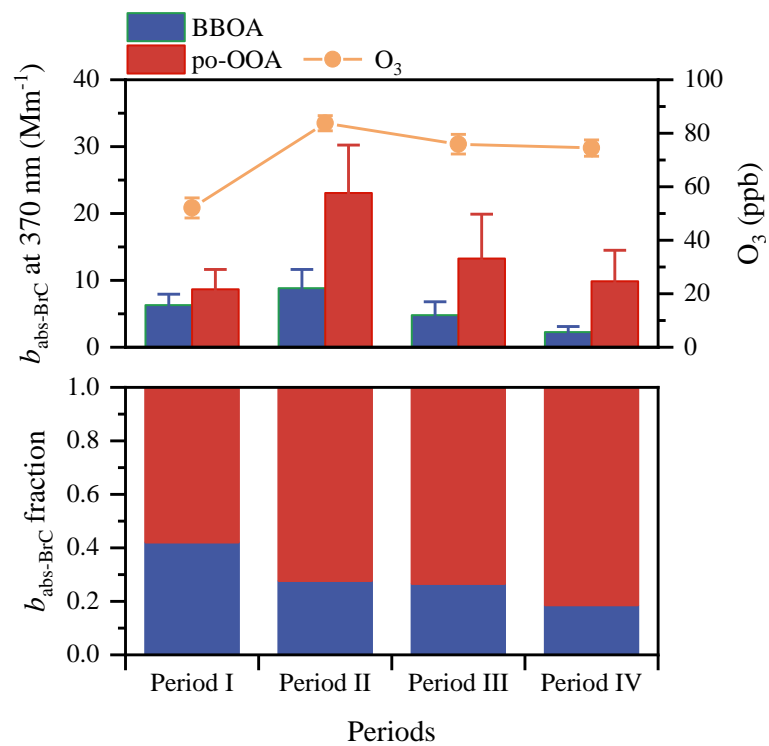

24

25 **Figure S5.** Light absorption coefficient of BrC ( $b_{\text{abs-BrC}}$ ) at 370 nm from BBOA and po-OOA and its fraction in the total

26 reconstructed BrC absorption at different periods.
